# Supplementary material for: Thermodynamics and kinetic investigation of electron transfer reactions of surfactant cobalt(iii) complexes containing diimine ligands with iron(ii) in the presence of liposome vesicles and amphiphilic salt media
Source: Royal Society of Chemistry journal article supplement (doi:10.1039/c4ra07404a), 2014-01-01
Supplement: c4ra07404a1.pdf [file c4ra07404a1.pdf]

### Electronic Supplementary Informations (ESI)

#### SI Figure Captions

SI Fig. 1 Plot of  $k$  against DPPC for Cis-[Co(dpq)<sub>2</sub>(C<sub>12</sub>H<sub>25</sub>NH<sub>2</sub>)<sub>2</sub>](ClO<sub>4</sub>)<sub>3</sub> under different temperatures; cis-[Co(ip)<sub>2</sub>(C<sub>12</sub>H<sub>25</sub>NH<sub>2</sub>)<sub>2</sub>](ClO<sub>4</sub>)<sub>3</sub> =  $4 \times 10^{-4}$  mol dm<sup>-3</sup>,  $\mu$  = 1.0 mol dm<sup>-3</sup>, [iron(II)] = 0.01 mol dm<sup>-3</sup>

5 SI Fig. 2 Plot of  $k$  against DPPC for Cis-[Co(dpqc)<sub>2</sub>(C<sub>12</sub>H<sub>25</sub>NH<sub>2</sub>)<sub>2</sub>](ClO<sub>4</sub>)<sub>3</sub> under different temperatures; cis-[Co(ip)<sub>2</sub>(C<sub>12</sub>H<sub>25</sub>NH<sub>2</sub>)<sub>2</sub>](ClO<sub>4</sub>)<sub>3</sub> =  $4 \times 10^{-4}$  mol dm<sup>-3</sup>,  $\mu$  = 1.0 mol dm<sup>-3</sup>, [iron(II)] = 0.01 mol dm<sup>-3</sup>

SI Fig. 3 Plot of  $k$  against [BMIM]Br for Cis-[Co(dpq)<sub>2</sub>(C<sub>12</sub>H<sub>25</sub>NH<sub>2</sub>)<sub>2</sub>](ClO<sub>4</sub>)<sub>3</sub> at different temperatures; Cis-[Co(ip)<sub>2</sub>(C<sub>12</sub>H<sub>25</sub>NH<sub>2</sub>)<sub>2</sub>](ClO<sub>4</sub>)<sub>3</sub> =  $4 \times 10^{-4}$  mol dm<sup>-3</sup>,  $\mu$  = 1.0 mol dm<sup>-3</sup>, [iron(II)] = 0.01 mol dm<sup>-3</sup>

SI Fig. 4 Plot of  $k$  against [BMIM]Br for Cis-[Co(dpqc)<sub>2</sub>(C<sub>12</sub>H<sub>25</sub>NH<sub>2</sub>)<sub>2</sub>](ClO<sub>4</sub>)<sub>3</sub> at different temperatures; Cis-  
10 [Co(ip)<sub>2</sub>(C<sub>12</sub>H<sub>25</sub>NH<sub>2</sub>)<sub>2</sub>](ClO<sub>4</sub>)<sub>3</sub> =  $4 \times 10^{-4}$  mol dm<sup>-3</sup>,  $\mu$  = 1.0 mol dm<sup>-3</sup>, [iron(II)] = 0.01 mol dm<sup>-3</sup>

SI Fig. 5 Eyring plot for Cis-[Co(ip)<sub>2</sub>(C<sub>12</sub>H<sub>25</sub>NH<sub>2</sub>)<sub>2</sub>](ClO<sub>4</sub>)<sub>3</sub> in DPPC medium. [Complex] =  $4 \times 10^{-4}$  mol dm<sup>-3</sup>; [iron(II)] = 0.01 mol dm<sup>-3</sup>;  $[\mu]$  = 1.0 mol dm<sup>-3</sup>.

SI Fig. 6 Eyring plot for Cis-[Co(dpq)<sub>2</sub>(C<sub>12</sub>H<sub>25</sub>NH<sub>2</sub>)<sub>2</sub>](ClO<sub>4</sub>)<sub>3</sub> in DPPC medium. [Complex] =  $4 \times 10^{-4}$  mol dm<sup>-3</sup>; [iron(II)] = 0.01 mol dm<sup>-3</sup>;  $[\mu]$  = 1.0 mol dm<sup>-3</sup>.

15 SI Fig. 7 Eyring plot for Cis-[Co(dpqc)<sub>2</sub>(C<sub>12</sub>H<sub>25</sub>NH<sub>2</sub>)<sub>2</sub>](ClO<sub>4</sub>)<sub>3</sub> in DPPC medium. [Complex] =  $4 \times 10^{-4}$  mol dm<sup>-3</sup>; [iron(II)] = 0.01 mol dm<sup>-3</sup>;  $[\mu]$  = 1.0 mol dm<sup>-3</sup>.

SI Fig. 8 Eyring plot for Cis-[Co(ip)<sub>2</sub>(C<sub>12</sub>H<sub>25</sub>NH<sub>2</sub>)<sub>2</sub>](ClO<sub>4</sub>)<sub>3</sub> in [BMIM]Br medium. [Complex] =  $4 \times 10^{-4}$  mol dm<sup>-3</sup>; [iron(II)] = 0.01 mol dm<sup>-3</sup>;  $[\mu]$  = 1.0 mol dm<sup>-3</sup>.

SI Fig. 9 Eyring plot for Cis-[Co(dpq)<sub>2</sub>(C<sub>12</sub>H<sub>25</sub>NH<sub>2</sub>)<sub>2</sub>](ClO<sub>4</sub>)<sub>3</sub> in [BMIM]Br medium. [Complex] =  $4 \times 10^{-4}$  mol dm<sup>-3</sup>; [iron(II)] =  
20 0.01 mol dm<sup>-3</sup>;  $[\mu]$  = 1.0 mol dm<sup>-3</sup>.

SI Fig. 10 Eyring plot for Cis-[Co(dpqc)<sub>2</sub>(C<sub>12</sub>H<sub>25</sub>NH<sub>2</sub>)<sub>2</sub>](ClO<sub>4</sub>)<sub>3</sub> in [BMIM]Br medium. [Complex] =  $4 \times 10^{-4}$  mol dm<sup>-3</sup>; [iron(II)] = 0.01 mol dm<sup>-3</sup>;  $[\mu]$  = 1.0 mol dm<sup>-3</sup>.

SI Fig. 11 Isokinetic plot of the activation parameters for the reduction of Cis-[Co(ip)<sub>2</sub>(C<sub>12</sub>H<sub>25</sub>NH<sub>2</sub>)<sub>2</sub>](ClO<sub>4</sub>)<sub>3</sub> by ion(II) in DPPC medium. [Complex] =  $4 \times 10^{-4}$  mol dm<sup>-3</sup>; [iron(II)] = 0.01 mol dm<sup>-3</sup>;  $[\mu]$  = 1.0 mol dm<sup>-3</sup>.

25 SI Fig. 12 Isokinetic plot of the activation parameters for the reduction of Cis-[Co(dpq)<sub>2</sub>(C<sub>12</sub>H<sub>25</sub>NH<sub>2</sub>)<sub>2</sub>](ClO<sub>4</sub>)<sub>3</sub> by ion(II) in DPPC medium. [Complex] =  $4 \times 10^{-4}$  mol dm<sup>-3</sup>; [iron(II)] = 0.01 mol dm<sup>-3</sup>;  $[\mu]$  = 1.0 mol dm<sup>-3</sup>.

SI Fig. 13 Isokinetic plot of the activation parameters for the reduction of Cis-[Co(dpqc)<sub>2</sub>(C<sub>12</sub>H<sub>25</sub>NH<sub>2</sub>)<sub>2</sub>](ClO<sub>4</sub>)<sub>3</sub> by ion(II) in aqueous solutions. [Complex] =  $4 \times 10^{-4}$  mol dm<sup>-3</sup>; [iron(II)] = 0.01 mol dm<sup>-3</sup>;  $[\mu]$  = 1.0 mol dm<sup>-3</sup>.

SI Fig. 14 Isokinetic plot of the activation parameters for the reduction of Cis-[Co(ip)<sub>2</sub>(C<sub>12</sub>H<sub>25</sub>NH<sub>2</sub>)<sub>2</sub>](ClO<sub>4</sub>)<sub>3</sub> by ion(II) in  
30 [BMIM]Br medium. [Complex] =  $4 \times 10^{-4}$  mol dm<sup>-3</sup>; [iron(II)] = 0.01 mol dm<sup>-3</sup>;  $[\mu]$  = 1.0 mol dm<sup>-3</sup>.

SI Fig. 15 Isokinetic plot of the activation parameters for the reduction of Cis-[Co(dpq)<sub>2</sub>(C<sub>12</sub>H<sub>25</sub>NH<sub>2</sub>)<sub>2</sub>](ClO<sub>4</sub>)<sub>3</sub> by ion(II) in [BMIM]Br medium. [Complex] = 4 x 10<sup>-4</sup> mol dm<sup>-3</sup>; [iron(II)] = 0.01 mol dm<sup>-3</sup>; [μ] = 1.0 mol dm<sup>-3</sup>.

SI Fig. 16 Isokinetic plot of the activation parameters for the reduction of Cis-[Co(dpqc)<sub>2</sub>(C<sub>12</sub>H<sub>25</sub>NH<sub>2</sub>)<sub>2</sub>](ClO<sub>4</sub>)<sub>3</sub> by ion(II) in [BMIM]Br medium. [Complex] = 4 x 10<sup>-4</sup> mol dm<sup>-3</sup>; [iron(II)] = 0.01 mol dm<sup>-3</sup>; [μ] = 1.0 mol dm<sup>-3</sup>.

## 5 SI Table Captions

SI Table 1. Second-order rate constants for the reduction of cobalt(III) complex ion by iron(II) in DPPC under different temperatures. Cis-[Co(dpq)<sub>2</sub>(C<sub>12</sub>H<sub>25</sub>NH<sub>2</sub>)<sub>2</sub>](ClO<sub>4</sub>)<sub>3</sub> = 4 x 10<sup>-4</sup> mol dm<sup>-3</sup>, μ = 1.0 mol dm<sup>-3</sup>, [iron(II)] = 0.01 mol dm<sup>-3</sup>

SI Table 2. Second-order rate constants for the reduction of cobalt(III) complex ion by iron(II) in DPPC under different temperatures. Cis-[Co(dpqc)<sub>2</sub>(C<sub>12</sub>H<sub>25</sub>NH<sub>2</sub>)<sub>2</sub>](ClO<sub>4</sub>)<sub>3</sub> = 4 x 10<sup>-4</sup> mol dm<sup>-3</sup>, μ = 1.0 mol dm<sup>-3</sup>, [Fe<sup>2+</sup>] = 0.01 mol dm<sup>-3</sup>

10 SI Table 3. Second-order rate constants for the reduction of cobalt(III) complex ion by iron(II) in the presence of [BMIM]Br medium under different temperatures. Cis-[Co(dpq)<sub>2</sub>(C<sub>12</sub>H<sub>25</sub>NH<sub>2</sub>)<sub>2</sub>](ClO<sub>4</sub>)<sub>3</sub> = 4 x 10<sup>-4</sup> mol dm<sup>-3</sup>, μ = 1.0 mol dm<sup>-3</sup>, [iron(II)] = 0.01 mol dm<sup>-3</sup>

SI Table 4. Second-order rate constants for the reduction of cobalt(III) complex ion by iron(II) in the presence of [BMIM]Br medium under different temperatures. Cis-[Co(dpqc)<sub>2</sub>(C<sub>12</sub>H<sub>25</sub>NH<sub>2</sub>)<sub>2</sub>](ClO<sub>4</sub>)<sub>3</sub> = 4 x 10<sup>-4</sup> mol dm<sup>-3</sup>, μ = 1.0 mol dm<sup>-3</sup>, [iron(II)] =  
15 0.01 mol dm<sup>-3</sup>

SI Table 5. Activation parameters for the reduction of Cis-[Co(dpq)<sub>2</sub>(C<sub>12</sub>H<sub>25</sub>NH<sub>2</sub>)<sub>2</sub>](ClO<sub>4</sub>)<sub>3</sub>, μ = 1.0 moldm<sup>-3</sup> in DPPC medium

SI Table 6. Activation parameters for the reduction of Cis-[Co(dpqc)<sub>2</sub>(C<sub>12</sub>H<sub>25</sub>NH<sub>2</sub>)<sub>2</sub>](ClO<sub>4</sub>)<sub>3</sub>, μ = 1.0 moldm<sup>-3</sup> in DPPC medium

SI Table 7. Activation parameters for the reduction of Cis-[Co(dpq)<sub>2</sub>(C<sub>12</sub>H<sub>25</sub>NH<sub>2</sub>)<sub>2</sub>](ClO<sub>4</sub>)<sub>3</sub>, μ = 1.0 moldm<sup>-3</sup> in [BMIM]Br medium medium

20 SI Table 8. Activation parameters for the reduction of Cis-[Co(dpqc)<sub>2</sub>(C<sub>12</sub>H<sub>25</sub>NH<sub>2</sub>)<sub>2</sub>](ClO<sub>4</sub>)<sub>3</sub>, μ = 1.0 moldm<sup>-3</sup> in [BMIM]Br medium

### SI Figures

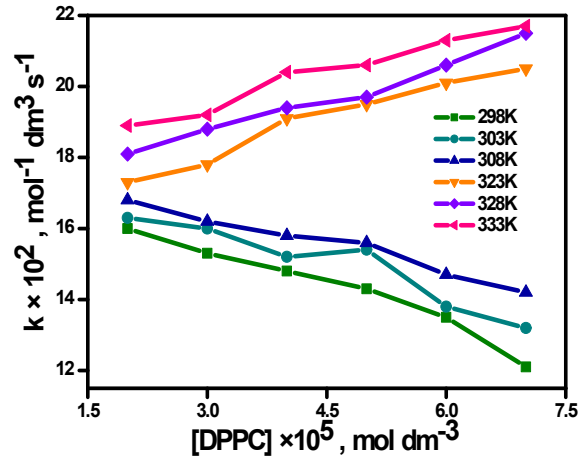

SI Fig. 1

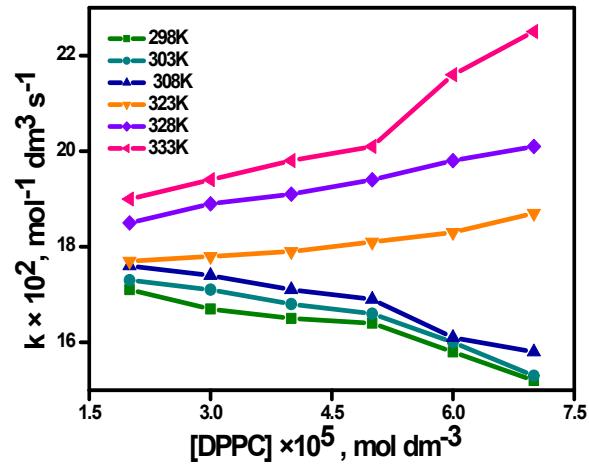

SI Fig. 2

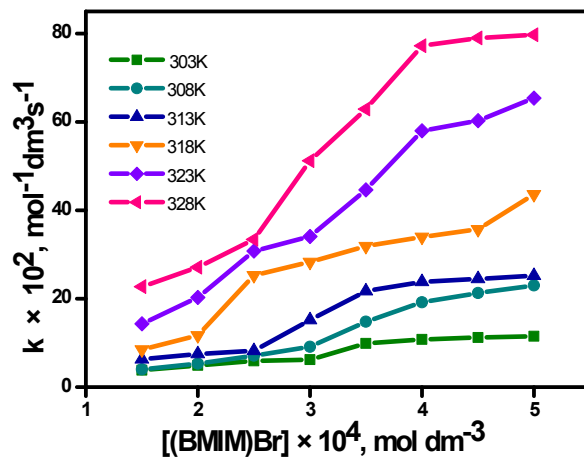

5

10

15

20

25

SI Fig. 3

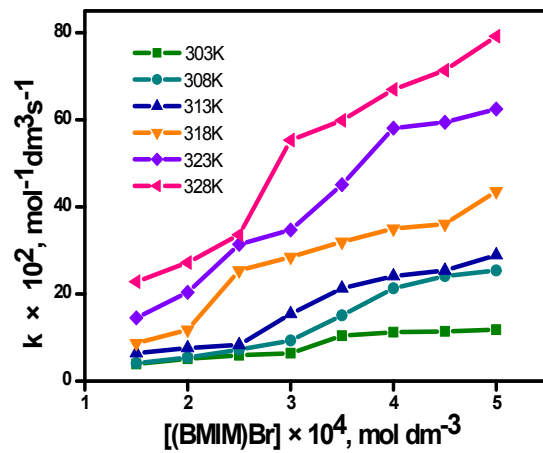

SI Fig. 4

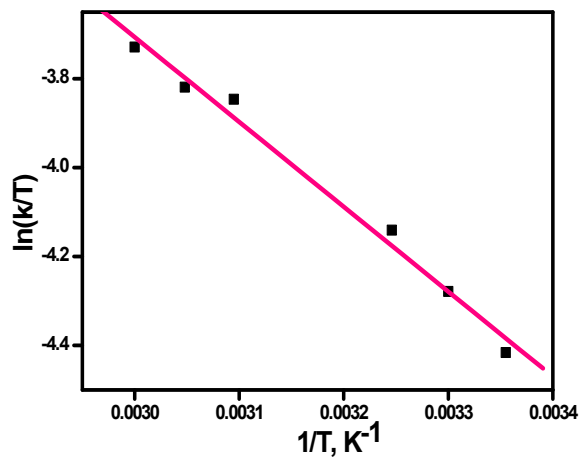

SI Fig. 5

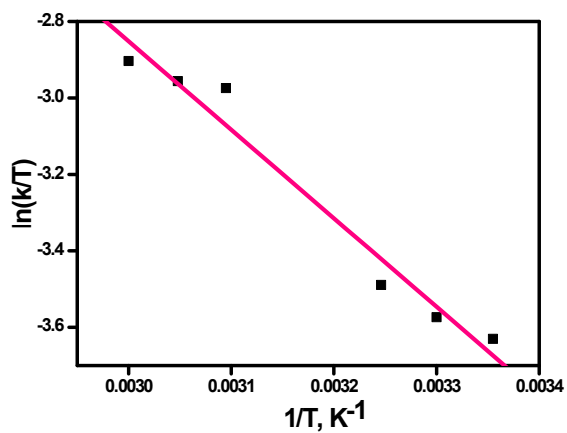

SI Fig. 6

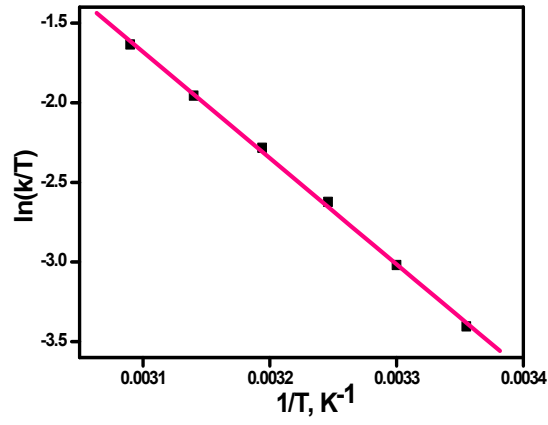

SI Fig. 7

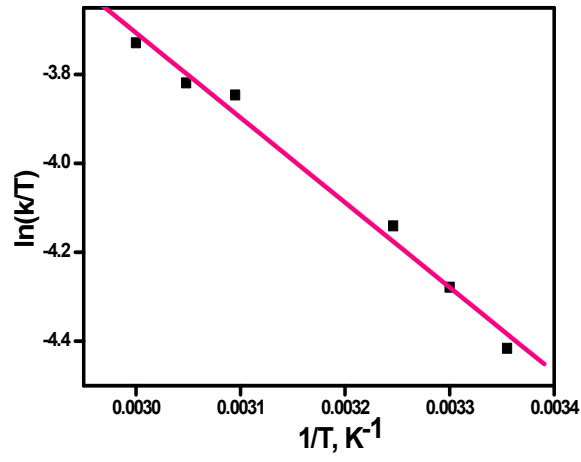

SI Fig. 8

5

10

15

20

25

5

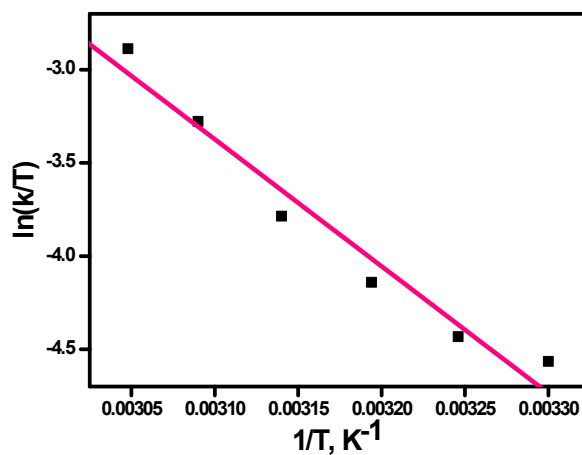

SI Fig. 9

10

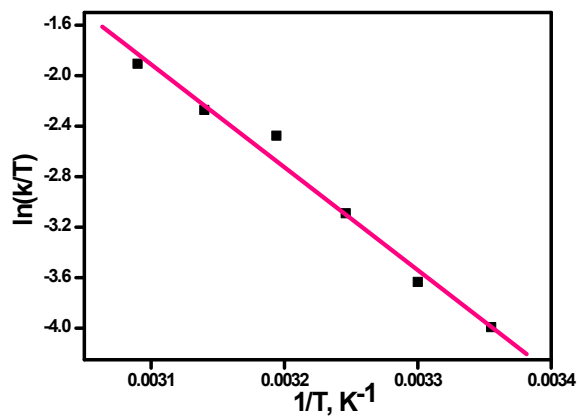

SI Fig. 10

20

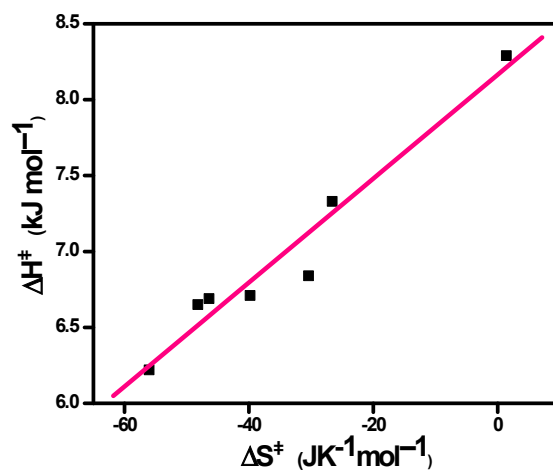

25

SI Fig. 11

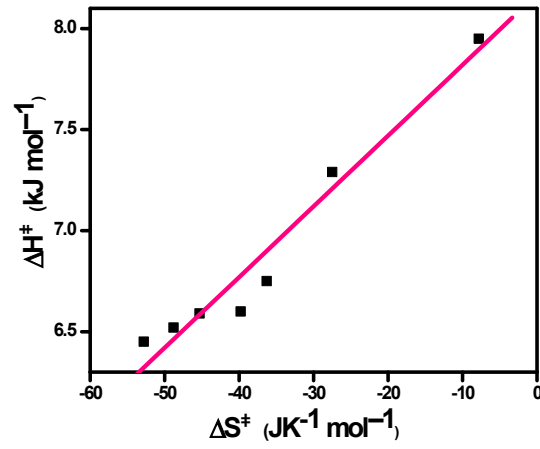

5

S Fig. 12

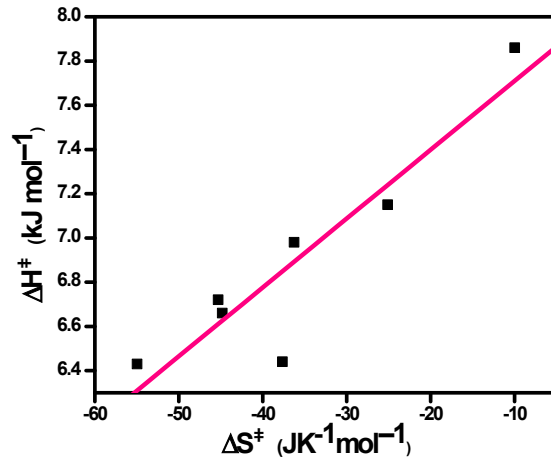

15

20

SI Fig. 13

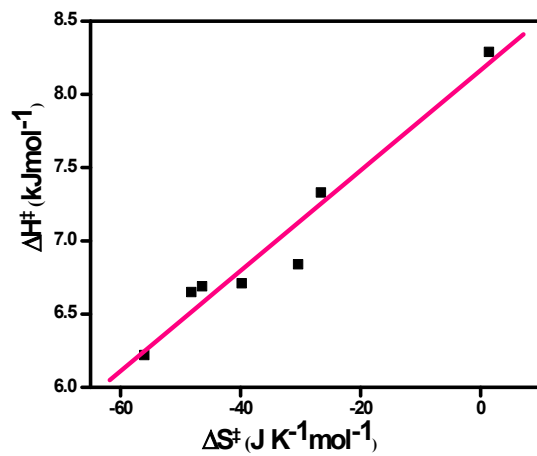

25

SI Fig. 14

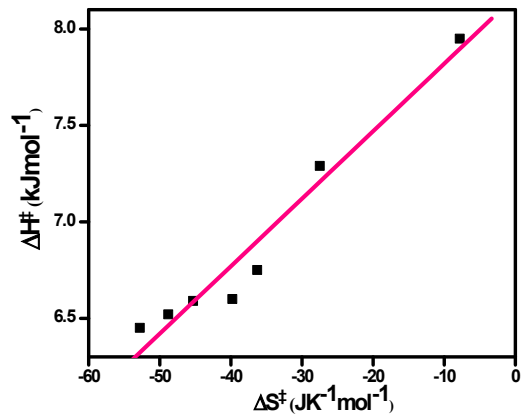

5

10

SI Fig. 15

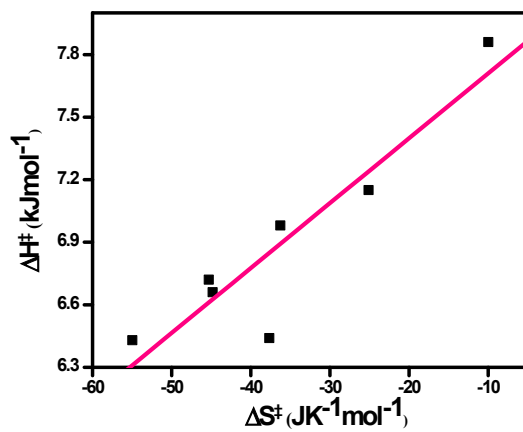

15

20

SI Fig. 16

25



## SI Tables

### SI Table 1

| [DPPC] × 10 <sup>5</sup><br>(mol dm <sup>-3</sup> ) |     | k × 10 <sup>2</sup> , dm <sup>3</sup> mol <sup>-1</sup> s <sup>-1</sup> |      |      |      |      |      |
|-----------------------------------------------------|-----|-------------------------------------------------------------------------|------|------|------|------|------|
|                                                     |     | 298K                                                                    | 303K | 308K | 323K | 328K | 333K |
| 5                                                   | 2.0 | 16.0                                                                    | 16.3 | 16.8 | 17.3 | 18.1 | 18.9 |
|                                                     | 3.0 | 15.3                                                                    | 16.0 | 16.2 | 17.8 | 18.8 | 19.2 |
|                                                     | 4.0 | 14.8                                                                    | 15.2 | 15.8 | 19.1 | 19.4 | 20.4 |
|                                                     | 5.0 | 14.3                                                                    | 15.4 | 15.6 | 19.5 | 19.7 | 20.6 |
|                                                     | 6.0 | 13.5                                                                    | 13.8 | 14.7 | 20.1 | 20.6 | 21.3 |
| 10                                                  | 7.0 | 12.1                                                                    | 13.2 | 14.2 | 20.5 | 21.5 | 21.7 |

### SI Table 2

| [DPPC] × 10 <sup>5</sup><br>(mol dm <sup>-3</sup> ) |     | k × 10 <sup>2</sup> , dm <sup>3</sup> mol <sup>-1</sup> s <sup>-1</sup> |      |      |      |      |      |
|-----------------------------------------------------|-----|-------------------------------------------------------------------------|------|------|------|------|------|
|                                                     |     | 298K                                                                    | 303K | 308K | 323K | 328K | 333K |
| 15                                                  | 2.0 | 17.1                                                                    | 17.3 | 17.6 | 17.7 | 18.5 | 19.0 |
|                                                     | 3.0 | 16.7                                                                    | 17.1 | 17.4 | 17.8 | 18.9 | 19.4 |
|                                                     | 4.0 | 16.5                                                                    | 16.8 | 17.1 | 17.9 | 19.1 | 19.8 |
|                                                     | 5.0 | 16.4                                                                    | 16.6 | 16.9 | 18.1 | 19.4 | 20.1 |
|                                                     | 6.0 | 15.8                                                                    | 16.0 | 16.1 | 18.3 | 19.8 | 21.6 |
| 20                                                  | 7.0 | 15.2                                                                    | 15.3 | 15.8 | 18.7 | 20.1 | 22.5 |

SI Table 3

|                                                             |     | $k \times 10^2, \text{ dm}^3 \text{ mol}^{-1} \text{ s}^{-1}$ |      |      |      |      |      |
|-------------------------------------------------------------|-----|---------------------------------------------------------------|------|------|------|------|------|
| $[(\text{BMIM})\text{Br}] \times 10^4, \text{ mol dm}^{-3}$ |     | 303K                                                          | 308K | 313K | 318K | 323K | 328K |
| 5                                                           | 1.5 | 4.1                                                           | 4.3  | 6.7  | 9.1  | 15.0 | 23.1 |
|                                                             | 2.0 | 5.2                                                           | 5.5  | 7.8  | 11.5 | 21.2 | 28.1 |
|                                                             | 2.5 | 6.0                                                           | 7.3  | 8.5  | 25.6 | 31.4 | 33.8 |
|                                                             | 3.0 | 6.5                                                           | 9.4  | 15.5 | 28.9 | 34.8 | 56.1 |
|                                                             | 3.5 | 10.8                                                          | 15.3 | 21.4 | 32.1 | 45.4 | 63.8 |
|                                                             | 4.0 | 11.5                                                          | 21.0 | 24.7 | 35.3 | 59.4 | 78.2 |
| 10                                                          | 4.5 | 11.9                                                          | 22.4 | 25.8 | 37.1 | 60.0 | 79.4 |

SI Table 4

|                                                             |     | $k \times 10^2, \text{ dm}^3 \text{ mol}^{-1} \text{ s}^{-1}$ |      |      |      |      |      |      |
|-------------------------------------------------------------|-----|---------------------------------------------------------------|------|------|------|------|------|------|
| $[(\text{BMIM})\text{Br}] \times 10^4, \text{ mol dm}^{-3}$ |     | 303K                                                          | 308K | 313K | 318K | 323K | 328K |      |
| 15                                                          | 1.5 | 4.2                                                           | 4.4  | 6.8  | 9.2  | 15.1 | 23.2 |      |
|                                                             | 2.0 | 5.3                                                           | 5.6  | 7.9  | 17.6 | 23.0 | 29.1 |      |
|                                                             | 2.5 | 6.3                                                           | 7.4  | 8.1  | 25.7 | 31.6 | 33.9 |      |
|                                                             | 3.0 | 6.6                                                           | 9.8  | 15.7 | 28.9 | 34.9 | 56.6 |      |
|                                                             | 20  | 3.5                                                           | 10.9 | 15.4 | 21.6 | 32.7 | 45.8 | 64.1 |
|                                                             |     | 4.0                                                           | 11.6 | 21.1 | 25.2 | 35.8 | 60.1 | 71.6 |
|                                                             |     | 4.5                                                           | 12.1 | 22.6 | 27.9 | 38.4 | 64.5 | 80.1 |

SI Table 5

|   | [DPPC] $\times 10^5$<br>(mol dm $^{-3}$ ) | $\Delta H^\ddagger$ kJmol $^{-1}$ | $\Delta S^\ddagger$ JK $^{-1}$ |
|---|-------------------------------------------|-----------------------------------|--------------------------------|
|   | 2.0                                       | 6.45                              | -52.8                          |
| 5 | 3.0                                       | 6.52                              | -48.8                          |
|   | 4.0                                       | 6.59                              | -45.3                          |
|   | 5.0                                       | 6.60                              | -39.8                          |
|   | 6.0                                       | 6.75                              | -36.3                          |
|   | 7.0                                       | 7.29                              | -27.5                          |
|   | 8.0                                       | 7.95                              | -7.8                           |

10

SI Table 6

|    | [DPPC] $\times 10^5$<br>(mol dm $^{-3}$ ) | $\Delta H^\ddagger$ kJmol $^{-1}$ | $\Delta S^\ddagger$ JK $^{-1}$ |
|----|-------------------------------------------|-----------------------------------|--------------------------------|
|    | 2.0                                       | 6.43                              | -54.9                          |
| 15 | 3.0                                       | 6.44                              | -37.6                          |
|    | 4.0                                       | 6.66                              | -44.8                          |
|    | 5.0                                       | 6.72                              | -45.3                          |
|    | 6.0                                       | 6.98                              | -36.2                          |
|    | 7.0                                       | 7.15                              | -25.1                          |
| 20 | 8.0                                       | 7.86                              | -9.97                          |

25

SI Table 7

|   | $[(\text{BMIM})\text{Br}] \times 10^3,$<br>$\text{mol dm}^{-3}$ | $\Delta H^\ddagger$ $\text{kJmol}^{-1}$ | $\Delta S^\ddagger$ $\text{JK}^{-1}$ |
|---|-----------------------------------------------------------------|-----------------------------------------|--------------------------------------|
|   | 1.5                                                             | 6.45                                    | -52.8                                |
| 5 | 2.0                                                             | 6.52                                    | -48.8                                |
|   | 2.5                                                             | 6.59                                    | -45.3                                |
|   | 3.0                                                             | 6.60                                    | -39.8                                |
|   | 3.5                                                             | 6.75                                    | -36.3                                |
|   | 4.0                                                             | 7.29                                    | -27.5                                |
|   | 4.5                                                             | 7.95                                    | -7.8                                 |

10

SI Table 8

|    | $[(\text{BMIM})\text{Br}] \times 10^3,$<br>$\text{mol dm}^{-3}$ | $\Delta H^\ddagger$ $\text{kJmol}^{-1}$ | $\Delta S^\ddagger$ $\text{JK}^{-1}$ |
|----|-----------------------------------------------------------------|-----------------------------------------|--------------------------------------|
|    | 1.5                                                             | 6.43                                    | -54.9                                |
| 15 | 2.0                                                             | 6.44                                    | -37.7                                |
|    | 2.5                                                             | 6.66                                    | -44.8                                |
|    | 3.0                                                             | 6.72                                    | -45.3                                |
|    | 3.5                                                             | 6.98                                    | -36.3                                |
|    | 4.0                                                             | 7.15                                    | -25.1                                |
|    | 4.5                                                             | 7.86                                    | -9.9                                 |

20
